# Supplementary material
Source: PubMed Central journal article supplement (PMC2237890)
Supplement: NIHMS39081-supplement-supplement.pdf [file NIHMS39081-supplement-supplement.pdf]

## Supplemental Material for Online Posting

**Table S1 and S2. Composition of the diet-low in methionine and lacking folic acid and choline fed to Fisher rats to make them folate and methyl deficient.**

| Ingredients                         | g/kg  |
|-------------------------------------|-------|
| Dyets Alcohol-Extracted Peanut Meal | 90.0  |
| Dyets Soy Protein Isolate           | 80.0  |
| L-Cystine                           | 2.0   |
| L-methionine                        | 1.8   |
| Cellulose Fiber                     | 10.0  |
| Cornstarch                          | 100.0 |
| Dextrin                             | 100.0 |
| Sucrose                             | 410.0 |
| Vitamin free casein                 | 10.0  |
| AIN-76 mineral mix #200000          | 35.0  |
| Primex (Hydrogenated Vegetable Oil) | 100.0 |
| Vitamin Mix *                       | 10.0  |
| Niacin/sucrose pre-mix (10mg/g)     | 3.0   |
| Corn oil                            | 50.0  |

\*Used at 10g/kg Diet (Table S2).

| Ingradiant              | g/kg | Ingradiant                           | g/kg   |
|-------------------------|------|--------------------------------------|--------|
| Thiamine hydrochloride  | 0.60 | Vitamin A palmitate (500, 000unit/g) | 0.08   |
| Riboflavin              | 0.60 | Vitamin D3 (400,000U/g)              | 0.25   |
| Pyridoxin hydrochloride | 0.70 | Vitamin E acetate (500U/g)           | 10.0   |
| Calcium pantothenate    | 1.60 | Menadione sodium bisulfite           | 0.08   |
| Biotin                  | 0.02 | Sucorse (finely powdered)            | 984.35 |
| Vitamin B-12            | 1.0  |                                      |        |

**Table S3. The primer sequence, product size and RT-PCR conditions for rat Dnmts, MBDs and GST-pi**

| <b>mRNA</b>   | <b>Primer Sequence</b>                                                       | <b>Annealing temperature</b> | <b>Product size</b> |
|---------------|------------------------------------------------------------------------------|------------------------------|---------------------|
| <b>Dnmt1</b>  | F: 5'-GCTAAGGACGATGA<br>TGAGACG-3'<br>R: 5'-CTTTTTGGGTGACG<br>GCAACTC-3'     | 60°C                         | 447 bp              |
| <b>Dnmt3a</b> | F: 5'-CAGCGTCACACAGA<br>AGCATATCC-3'<br>R: 5'-GGTCCTCACTTTGCT<br>GAACTTGG-3' | 60°C                         | 436 bp              |
| <b>Dnmt3b</b> | F: 5'-GAATTTGAGCAGCC<br>CAGGTTG-3'<br>R: 5'-AAGAAGAGCCTTCC<br>TGTGCC-3'      | 60°C                         | 310 bp              |
| <b>MeCP2</b>  | F: 5'-ACTTCTCGTCAAGAT<br>GCCTTTCC-3'<br>R: 5'-TTTTCGCTTTCTGCC<br>AGGG-3'     | 55°C                         | 112 bp              |
| <b>MBD1</b>   | F: 5'-AAGATTCAGGGAAG<br>CGGCAAGC-3'<br>R: 5'-GAAGGTTGTGACTG<br>CTGTCCACTC-3' | 58°C                         | 239 bp              |
| <b>MBD2</b>   | F: 5'-GCCCAGGTAGTAAT                                                         | 55°C                         | 210 bp              |

---

GATGAGACCC-3'

R: 5'-GTTTCTTTTCGGACTT

GTTGGACTC-3'

**MBD3** F: 5'-CGC TATGACTCCTC 59°C 196 bp

CAACCAGG-3'

R: 5'-TGGCGGACAGCAGC

GTCTCAT-3'

**MBD4** F: 5'-GGAAGAGTCCCTCA 57°C 467 bp

GATTCTACTGG-3'

R: 5'-CCTTTTTTCTACCTG

TGTTCGTGG-3'

**GST-pi** F: 5'-GGGTCGCTCTTTAG 58°C 392 bp

GGCTTTATG-3'

R: 5'-TGGGACGGTTCAA

TGGTCAG-3'

---
